# Supplementary material for: Vitamin E Intake and Risk of Prostate Cancer: A Meta-Analysis
Source: MDPI journal article supplement (doi:10.3390/nu15010014), 2022-12-21
Supplement: s1 [file s1]

# Vitamin E Intake and Risk of Prostate Cancer: A Meta-Analysis

Wei Qi Loh <sup>1</sup>, Jiyoung Youn <sup>1,2</sup> and Wei Jie Seow <sup>1,\*</sup>

<sup>1</sup> Saw Swee Hock School of Public Health, National University of Singapore and National University Health System, 12 Science Drive 2, #10-01, Singapore 117549, Singapore

<sup>2</sup> Department of Food and Nutrition, College of Human Ecology, Seoul National University, Seoul 08826, Republic of Korea

\* Correspondence: ephswj@nus.edu.sg; Tel.: +65-6601-1243

**Table S1.** Search terms used to identify relevant references.

| Database         | Search strategy                                                                                                                                                                                            |
|------------------|------------------------------------------------------------------------------------------------------------------------------------------------------------------------------------------------------------|
| PUBMED           | #1 Vitamins [MeSH]                                                                                                                                                                                         |
|                  | #2 Vitamin*[Title/Abstract] OR micronutrient*[Title/Abstract] OR tocopherol*[Title/Abstract] OR tocotrienol*[Title/Abstract]                                                                               |
|                  | #3 #1 OR #2                                                                                                                                                                                                |
|                  | #4 Prostatic Neoplasms[MeSH]                                                                                                                                                                               |
|                  | #5 Prostate[Title/Abstract] OR prostatic[Title/Abstract]                                                                                                                                                   |
|                  | #6 neoplasm*[Title/Abstract] OR cancer*[Title/Abstract] OR tumor*[Title/Abstract] OR tumour*[Title/Abstract] OR carcinoma*[Title/Abstract] OR malignan*[Title/Abstract] OR adenocarcinoma*[Title/Abstract] |
|                  | #7 #5 AND #6                                                                                                                                                                                               |
|                  | #8 #4 OR #7                                                                                                                                                                                                |
|                  | #9 #3 AND #8                                                                                                                                                                                               |
| EMBASE           | #1 'vitamin'/exp                                                                                                                                                                                           |
|                  | #2 vitamin*:ab,ti OR micronutrient*:ab,ti OR tocopherol*:ab,ti OR tocotrienol*:ab,ti                                                                                                                       |
|                  | #3 #1 OR #2                                                                                                                                                                                                |
|                  | #4 'prostate tumor'/exp                                                                                                                                                                                    |
|                  | #5 prostate:ab,ti OR prostatic:ab,ti                                                                                                                                                                       |
|                  | #6 neoplasm*:ab,ti OR cancer*:ab,ti OR tumor*:ab,ti OR tumour*:ab,ti OR carcinoma*:ab,ti OR malignan*:ab,ti OR adenocarcinoma*:ab,ti                                                                       |
|                  | #7 #5 AND #6                                                                                                                                                                                               |
|                  | #8 #7 OR #4                                                                                                                                                                                                |
|                  | #9 #3 AND #8                                                                                                                                                                                               |
| Cochrane Library | #1 vitamin[MeSH]                                                                                                                                                                                           |
|                  | #2 (vitamin* or micronutrient* or tocopherol* or tocotrienol*):ab,ti,kw                                                                                                                                    |
|                  | #3 #1 OR #2                                                                                                                                                                                                |
|                  | #4 prostatic neoplasms[MeSH]                                                                                                                                                                               |
|                  | #5 (prostate or prostatic):ti,ab,kw                                                                                                                                                                        |
|                  | #6 (neoplasm* or cancer* or tumor* or tumour* or carcinoma* or malignan* or adenocarcinoma*):ti,ab,kw                                                                                                      |
|                  | #7 #5 AND #6                                                                                                                                                                                               |
|                  | #8 #4 OR #7                                                                                                                                                                                                |
|                  | #9 #3 AND #8                                                                                                                                                                                               |
